# Supplementary material
Source: PubMed Central journal article supplement (PMC9725066)
Supplement: EIJ-D-20-00561_Hauguel-Moreau_SD.pdf [file EIJ-D-20-00561_Hauguel-Moreau_SD.pdf]

## Supplementary data

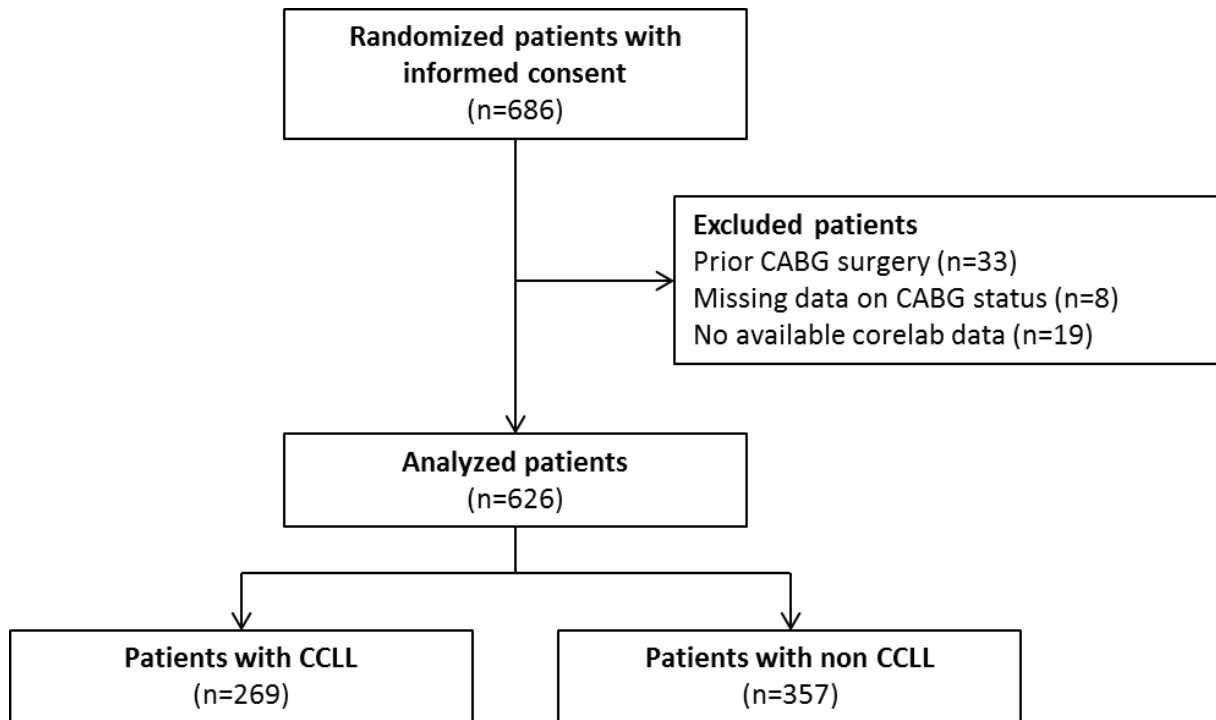

**Supplementary Figure 1.** Flow chart.

CABG: coronary artery bypass graft; CCLL: critical culprit lesion location

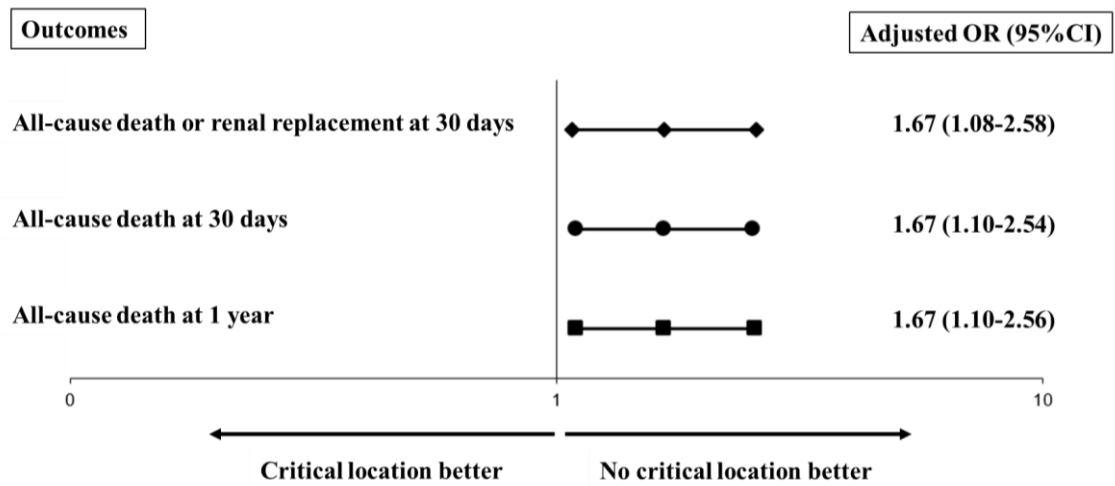

**Supplementary Figure 2.** Early and late outcomes according to critical culprit lesion location adjusted for revascularisation strategy (covariates of adjustment are detailed in Supplementary Table 1).

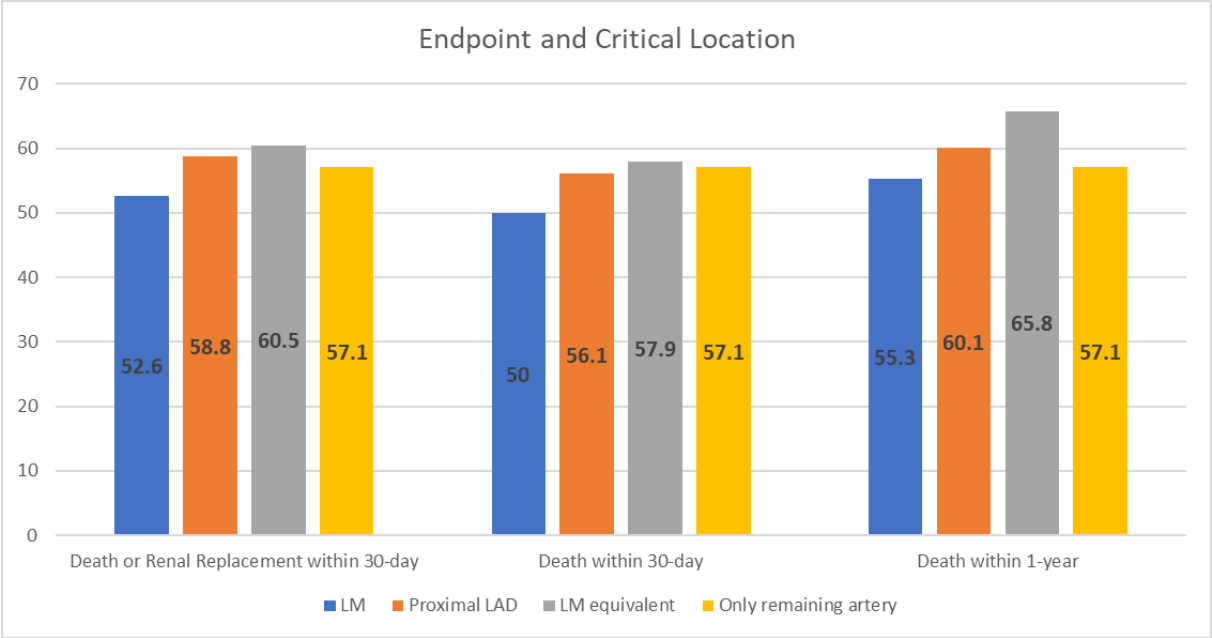

**Supplementary Figure 3.** Early and late outcomes according to individual critical culprit lesion location (covariates of adjustment are detailed in Supplementary Table 1).

**Supplementary Table 1. Variables associated with outcomes in univariate analysis.**

|                                          | 30-day death<br>or RRT | 30-day death | 1-year death |
|------------------------------------------|------------------------|--------------|--------------|
| Age (years)                              | <0.0001                | <0.0001      | <0.0001      |
| Sex                                      | 0.2825                 | 0.1008       | 0.2509       |
| Body mass index (kg/m <sup>2</sup> )     | 0.1440                 | 0.2692       | 0.2717       |
| Smoking status                           | <0.0001                | <0.0001      | <0.0001      |
| Hypertension                             | 0.7963                 | 0.9924       | 0.7383       |
| Hypercholesterolaemia                    | 0.0002                 | <0.0001      | 0.0011       |
| Diabetes mellitus                        | 0.0090                 | 0.0435       | 0.0010       |
| Prior myocardial infarction              | 0.9805                 | 0.8523       | 0.3563       |
| Prior stroke                             | 0.1869                 | 0.2659       | 0.0834       |
| Known peripheral artery disease          | 0.5829                 | 0.6985       | 0.6242       |
| Known renal insufficiency                | 0.0254                 | 0.0179       | 0.0208       |
| Prior percutaneous coronary intervention | 0.1940                 | 0.1067       | 0.5301       |
| Arterial lactate >2 mmol/l               | 0.0082                 | 0.0086       | 0.0080       |
| Fibrinolysis before randomisation        | 0.7033                 | 0.6807       | 0.1079       |
| Resuscitation before randomisation       | 0.6553                 | 0.7716       | 0.7468       |
| Anterior ST-segment elevation            | 0.2891                 | 0.3710       | 0.4214       |
| At least one CTO                         | 0.0100                 | 0.0077       | 0.0203       |
| Femoral access                           | 0.0064                 | 0.0105       | 0.0199       |

|                                                |          |          |          |
|------------------------------------------------|----------|----------|----------|
| Stent in culprit lesion                        | 0.0010   | 0.0009   | 0.0004   |
| Mechanical circulatory support                 | <0.0001  | <0.0001  | <0.0001  |
| Mild hypothermia                               | 0.4612   | 0.8999   | 0.9053   |
| Mechanical ventilation                         | <0.0001  | <0.0001  | <0.0001  |
| Catecholamine therapy                          | <0.0001  | <0.0001  | <0.0001  |
| Post-PCI TIMI flow 3                           | 0.0007   | 0.0002   | 0.0007   |
| Baseline SYNTAX score                          | <0.0001  | <0.0001  | <0.0001  |
| Randomised coronary revascularisation strategy | 0.0254*  | 0.0639*  | 0.0943*  |
| Effective coronary revascularisation strategy  | 0.0250** | 0.1092** | 0.1377** |

Grey cells are covariates of adjustment ( $p < 0.2$ ).

\* Covariate of adjustment for primary analysis.

\*\* Covariate of adjustment for sensitivity analysis.

RRT: renal replacement therapy
